# Supplementary material
Source: publisher site journal article supplement (https://www.dovepress.com/article/255336)
Supplement: Supplementary file 1 [file get_supplementary_file.php]

**Supplementary Table 1**. Pain and functional outcomes at 4- and 6-month phone surveys, based on the status of high PCS (PCS≧20) and low PCS (PCS<20)

| **Characteristic** | **Follow-up at 4 months** | | **Follow-up at 6 months** | |
| --- | --- | --- | --- | --- |
| **High PCS (PCS≥20), n=63** | **Low PCS (PCS<20), n=109** | **High PCS (PCS≥20), n=53** | **Low PCS (PCS<20), n=97** |
| Chronic post-hysterectomy pain, n (%) | 26/63 (41.3%) | 24/109 (22.0%) | 14/53 (26.4%) | 10/97 (10.3%) |
| Duration of pain abdominal pain after surgery, n(%) |  |  |  |  |
| I don't know / I don't remember | 1/63 (1.6%) | 1/109 (0.9%) | 1/53 (1.9%) | 1/97 (1.1%) |
| Less than 1 month | 25/63 (39.7%) | 71/109 (65.1%) | 22/53 (41.5%) | 66/97 (68.0%) |
| 1 to 3 months | 9/63 (14.3%) | 10/109 (9.2%) | 8/53 (15.1%) | 7/97 (7.2%) |
| More than 3 months, but not now | 2/63 (3.2%) | 3/109 (2.8%) | 8/53 (15.1%) | 13/97 (13.4%) |
| I still have pain, even since the operation | 24/63 (38.1%) | 24/109 (22.0%) | 12/53 (22.6%) | 10/97 (10.3%) |
| I still have pain, it started sometime after the operation | 2/63 (3.2%) | 0/109 (0.0%) | 2/53 (3.8%) | 0/97 (0.0%) |
| Average pain score for the past 1 week (0-10), mean (SD) | 1.7 (2.16) | 0.8 (1.63) | 0.9 (1.44) | 0.4 (1.35) |
| How does the scar feel to touch, n (%) |  |  |  |  |
| Normal sensation | 33/63 (52.4%) | 75/109 (68.8%) | 35/53 (66.0%) | 79/97 (81.4%) |
| Reduced sensation | 25/63 (39.7%) | 24/109 (22.0%) | 15/53 (28.3%) | 16/97 (16.5%) |
| Increased sensation | 5/63 (7.9%) | 10/109 (9.2%) | 3/53 (5.7%) | 2/97 (2.1%) |
| Presence of pelvic pain within last 3 months, n (%) | 28/63 (44.4%) | 28/108 (25.9%) | 17/53 (32.1%) | 19/97 (19.6%) |
| Average pelvic pain score (0-10), mean (SD) | 3.9 (1.96) | 3.2 (1.81) | 3.0 (1.27) | 2.9 (2.20) |
| Worst pelvic pain score (0-10), mean (SD) | 4.9 (2.37) | 4.5 (2.30) | 4.6 (1.54) | 3.9 (2.32) |
| Pain interfering with sleep in last 3 months, n (%) | 11/62 (17.7%) | 8/108 (7.4%) | 7/53 (13.2%) | 4/97 (4.1%) |
| How much does pain affect your daily living now, n (%) |  |  |  |  |
| Not at all | 44/62 (71.0%) | 95/108 (88.0%) | 42/53 (79.2%) | 92/97 (94.8%) |
| Some | 16/62 (25.8%) | 12/108 (11.1%) | 11/53 (20.8%) | 3/97 (3.1%) |
| A lot, very much | 2/62 (3.2%) | 1/108 (0.9%) | 0/53 (0.0%) | 2/97 (2.1%) |
| Pain affecting the following activities, n (%) |  |  |  |  |
| Getting up from chair | 11/62 (17.7%) | 14/108 (13.0%) | 5/53 (9.4%) | 6/97 (6.2%) |
| Sitting down for more than 30 minutes | 15/62 (24.2%) | 10/108 (9.3%) | 3/53 (5.7%) | 1/97 (1.0%) |
| Standing up for more than 30 minutes | 14/62 (22.6%) | 19/108 (17.6%) | 7/53 (13.2%) | 9/97 (9.3%) |
| Walking up or down stairs | 15/62 (24.2%) | 18/108 (16.7%) | 7/53 (13.2%) | 9/96 (9.4%) |
| Carrying heavy bags | 22/62 (35.5%) | 31/103 (30.1%) | 19/51 (37.3%) | 21/95 (22.1%) |
| Driving | 0/62 (0.0%) | 1/108 (0.9%) | 10/53 (18.9%) | 20/97 (20.6%) |
| Sports | 4/62 (6.5%) | 6/108 (5.6%) | 1/53 (1.9%) | 4/97 (4.1%) |
| Working | 14/62 (22.6%) | 10/108 (9.3%) | 4/53 (7.5%) | 6/97 (6.2%) |
| Presence of pain during sexual intercourse within 3 months | 12/60 (20.0%) | 14/108 (13.0%) | 5/52 (9.6%) | 8/95 (8.4%) |
| Pain affecting mood, n (%) | 18/61 (29.5%) | 25/108 (23.1%) | 6/53 (11.3%) | 9/97 (9.3%) |

Values presented as mean (SD) or frequency (%) as appropriate.

Abbreviations: PCS – pain catastrophizing scale
